# Supplementary material
Source: PubMed Central journal article supplement (PMC9209558)
Supplement: NIHMS1764246-supplement-Supp1.pdf [file NIHMS1764246-supplement-Supp1.pdf]

Long-Term Reproducibility of OCTA

**Supplemental Table 1. Comparison of Rates of Vessel Density and Thickness Change among Healthy, Glaucoma Suspect, and Glaucoma**

|                                  | Overall                 | p value          | Healthy                | Glaucoma suspect        | Glaucoma                | p value |
|----------------------------------|-------------------------|------------------|------------------------|-------------------------|-------------------------|---------|
| Change Rate of Macula parameters |                         |                  |                        |                         |                         |         |
| wiVD (%/year)                    | -0.55<br>(-1.06, -0.03) | <b>0.037</b>     | -0.44<br>(-1.59, 0.71) | -0.59<br>(-1.33, 0.16)  | -0.54<br>(-1.44, 0.36)  | 0.979   |
| pfVD (%/year)                    | -0.45<br>(-0.98, 0.08)  | 0.094            | -0.27<br>(-1.46, 0.91) | -0.39<br>(-1.16, 0.37)  | -0.65<br>(-1.57, 0.28)  | 0.869   |
| wiGCC (µm/year)                  | -0.77<br>(-1.00, -0.54) | <b>&lt;0.001</b> | -0.47<br>(-0.97, 0.03) | -0.93<br>(-1.26, -0.60) | -0.72<br>(-1.12, -0.33) | 0.310   |
| pfGCC (µm/year)                  | -0.69<br>(-0.90, -0.47) | <b>&lt;0.001</b> | -0.38<br>(-0.85, 0.09) | -0.91<br>(-1.22, -0.61) | -0.55<br>(-0.92, -0.19) | 0.117   |
| Change Rate of ONH parameters    |                         |                  |                        |                         |                         |         |
| wiCD (%/year)                    | -0.60<br>(-1.04, -0.15) | <b>0.009</b>     | 0.19<br>(-0.86, 1.24)  | -0.93<br>(-1.60, -0.26) | -0.63<br>(-1.29, 0.04)  | 0.211   |
| cpCD (%/year)                    | -0.37<br>(-0.85, 0.12)  | 0.137            | 0.05<br>(-1.09, 1.19)  | -0.69<br>(-1.42, 0.04)  | -0.24<br>(-0.97, 0.49)  | 0.502   |
| cpRNFL (µm/year)                 | -0.51<br>(-1.18, 0.16)  | 0.137            | -0.40<br>(-2.03, 1.24) | -0.86<br>(-1.91, 0.18)  | -0.21<br>(-1.25, 0.83)  | 0.681   |

CD = capillary density; cp = circumpapillary; GCC = ganglion cell complex; ONH = optic nerve head; pf = parafoveal; RNFL = retinal nerve fibre layer; VD = vessel density; wi = whole image. Values are shown in  $\beta$  coefficient (95% confident interval). Statistically significant p value is shown in bold.
