# Supplementary material
Source: PubMed Central journal article supplement (PMC9209558)
Supplement: NIHMS1764246-supplement-Supp2.pdf [file NIHMS1764246-supplement-Supp2.pdf]

## Long-Term Reproducibility of OCTA

**Supplemental Table 2. ICC among Healthy, Glaucoma suspects, and Glaucoma for Macula and ONH parameters**

|        | Healthy              | Glaucoma suspects    | Glaucoma             |
|--------|----------------------|----------------------|----------------------|
| Macula |                      |                      |                      |
| wiVD   | 0.722 (0.410, 0.907) | 0.886 (0.788, 0.942) | 0.822 (0.650, 0.920) |
| pfVD   | 0.709 (0.391, 0.902) | 0.866 (0.755, 0.932) | 0.802 (0.617, 0.910) |
| wiGCC  | 0.995 (0.985, 0.999) | 0.996 (0.992, 0.998) | 0.995 (0.990, 0.998) |
| pfGCC  | 0.997 (0.990, 0.999) | 0.997 (0.994, 0.998) | 0.996 (0.991, 0.998) |
| ONH    |                      |                      |                      |
| wiCD   | 0.782 (0.548, 0.914) | 0.789 (0.653, 0.881) | 0.863 (0.764, 0.925) |
| cpCD   | 0.781 (0.545, 0.914) | 0.781 (0.642, 0.877) | 0.874 (0.781, 0.931) |
| cpRNFL | 0.945 (0.858, 0.980) | 0.984 (0.970, 0.992) | 0.950 (0.908, 0.974) |

CD = capillary density; cp = circumpapillary; GCC = ganglion cell complex; ICC = intra-class correlation; ONH = optic nerve head; pf = parafoveal; RNFL = retinal nerve fiber layer; VD = vessel density; wi = whole image. Values are shown in ICC (95% confident interval).
